# Supplementary material
Source: PubMed Central journal article supplement (PMC2829159)
Supplement: emboj2009384s2.pdf [file emboj2009384s2.pdf]

Manuscript EMBO-2009-72345

## **A fast dynamic mode on the EF-G-bound ribosome**

James Munro, Roger Altman, Chang-Shung Tung, Kevin Sanbonmatsu

*Corresponding author: Scott Blanchard, Weill Cornell Medical College of Cornell University*

---

**Review timeline:**

Submission date:

24 August 2009

Accepted:

23 November 2009

---

No Review Process File is available with this article, as the authors have chosen not to make the review process public in this case.
